# Supplementary material for: Factors Driving Microbial Community Dynamics and Potential Health Effects of Bacterial Pathogen on Landscape Lakes with Reclaimed Water Replenishment in Beijing, PR China
Source: MDPI journal article supplement (doi:10.3390/ijerph19095127), 2022-04-22
Supplement: s1 [file s1]

# Factors Driving Microbial Community Dynamics and Potential Health Effects of Bacterial Pathogen on Landscape Lakes with Reclaimed Water Replenishment in Beijing, PR China

Junzhi Zhang <sup>1,\*</sup>, Xiao He <sup>1</sup>, Huixin Zhang <sup>1</sup>, Yu Liao <sup>1</sup>, Qi Wang <sup>2,3</sup>, Luwei Li <sup>1</sup> and Jianwei Yu <sup>2,3,\*</sup>

<sup>1</sup> Beijing Climate Change Response Research and Education Center, Beijing University of Civil Engineering and Architecture, Beijing 100044, China; hexiao0365@126.com (X.H.); zhanghuixin\_bucea@163.com (H.Z.); yuliao\_1994@126.com (Y.L.); li\_hany@163.com (L.L.)

<sup>2</sup> Key Laboratory of Drinking Water Science and Technology, Research Center for Eco-Environmental Sciences, Chinese Academy of Sciences, Beijing 100085, China; qiwang\_st@rcees.ac.cn

<sup>3</sup> University of Chinese Academy of Sciences, Beijing 100019, China

\* Correspondence: zhangjunzhi@bucea.edu.cn (J.Z.); jwyu@rcees.ac.cn (J.Y.); Tel.: +86-010-61209207 (J.Z.); +86-010-62849149 (J.Y.)

## Section S1.

The lower limit of the number of bases for the reading tail mass value was 20. Sequences below the bound were filtered out; meanwhile, a window of 50 bps was set. When the average mass value was lower than 20, the back bases were truncated from the window. The removal of N-containing bases was conducted when the reads below 50 bps were filtered after quality control was complete. The paired reads were merged into a sequence, and the minimum limit of overlap length was 10 bps, based on the overlap relationship between paired-end reads (PE reads).

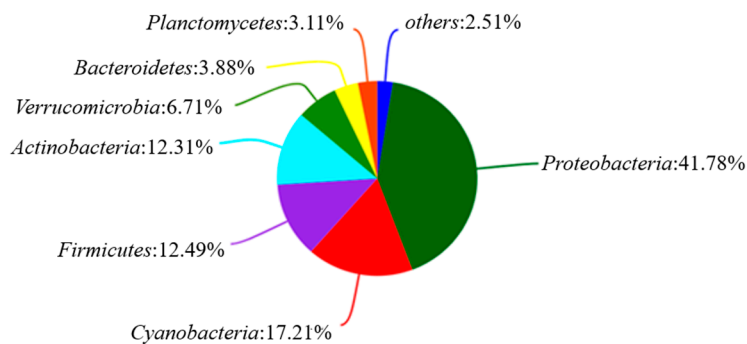

**Figure S1.** Pie pilot of microbial community on phylum level.

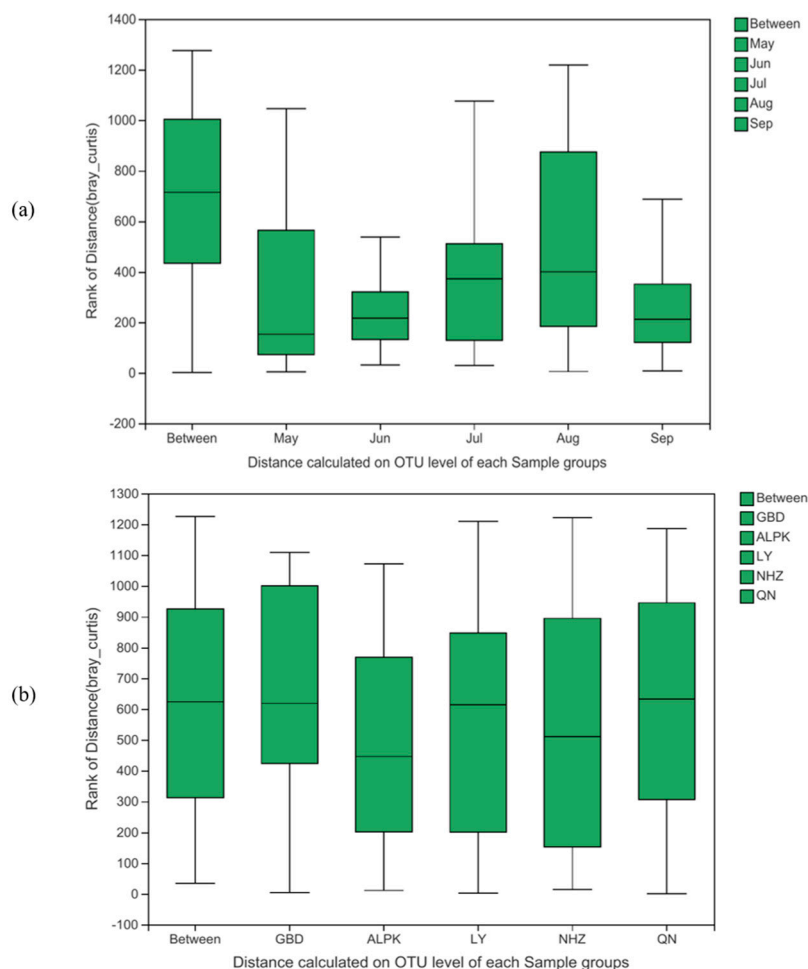

**Figure S2.** Analysis of similarities of microbial community in different groups on OTU level. The corresponding Adonis analysis results exhibited in Table S2.

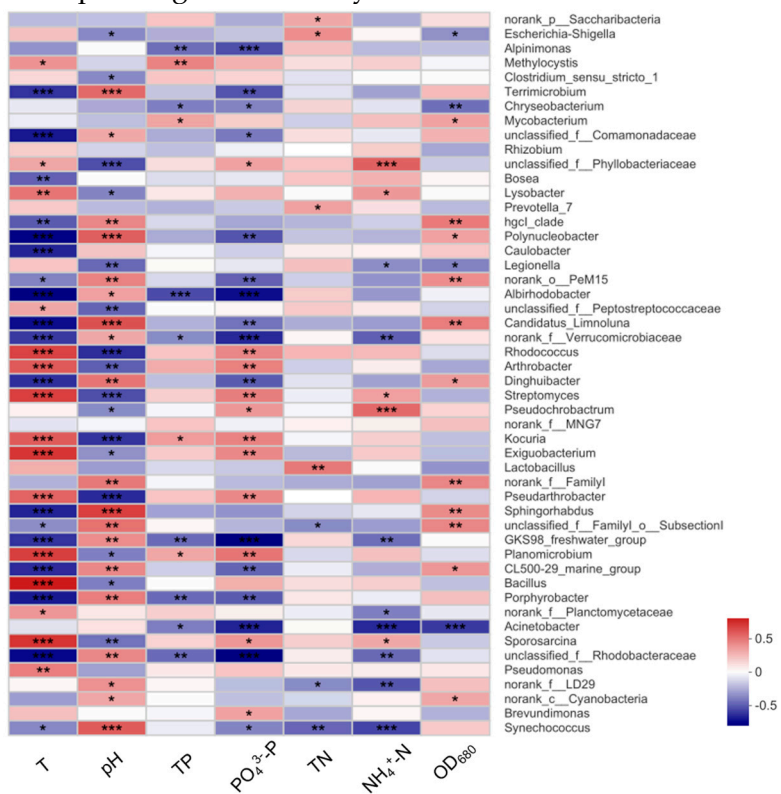

**Figure S3.** Spearman correlation heatmap of primary environmental factors and bacterial community with top 50 bacterial community abundance.  $0.01 < p \leq 0.05$ , \*  $0.001 < p \leq 0.01$ , \*\*\*  $p \leq 0.001$ .

**Table S1.** TN in different lakes and different layers in five months (unit: mg/L).

|             | May       | Jun        | Jul        | Aug        | Sep        |
|-------------|-----------|------------|------------|------------|------------|
| <b>ALPK</b> | 1.32±0.03 | 0.52±0.01  | 0.73±0.03  | 0.63±0.02  | 1.76±0.06  |
| <b>GBD</b>  | 9.75±0.15 | 10.45±0.14 | 11.76±1.24 | 14.52±0.08 | 11.05±0.08 |
| <b>LY</b>   | 1.06±0.03 | 1.11±0.08  | 1.26±0.04  | 0.99±1.00  | 1.0±0.04   |
| <b>NHZ</b>  | 1.65±0.01 | 1.48±0.04  | 1.34±0.44  | 1.76±0.06  | 2.03±0.03  |
| <b>QN</b>   | 5.13±0.10 | 4.40±0.08  | 2.81±0.05  | 2.11±0.06  | 1.05±0.02  |

**Table S2.** Adonis analysis of microbial community in different factor on OTU level

| Factors | Sums Of Sqs | Mean Sqs | F.Model | R <sup>2</sup> | P(>F) |
|---------|-------------|----------|---------|----------------|-------|
| Lake    | 3.09        | 0.77     | 2.16    | 0.16           | 0.001 |
| Month   | 5.22        | 1.31     | 4.19    | 0.27           | 0.001 |
